# Supplementary material for: The Value of Decreased Thyroid Hormone for Predicting Mortality in Adult Septic Patients: A Systematic Review and Meta-Analysis
Source: PubMed Central journal article supplement (PMC6148249; doi:10.1038/s41598-018-32543-7), 2018-09-20
Supplement: 41598_2018_32543_MOESM1_ESM.pdf [file 41598_2018_32543_MOESM1_ESM.pdf]

# **The Value of Decreased Thyroid Hormone for Predicting Mortality in Adult Septic Patients: A Systematic Review and Meta-Analysis**

Jae Guk Kim, M.D.<sup>1,†</sup>, Hyun Goo Shin, M.D.<sup>2,†</sup>, Wonhee Kim, M.D.<sup>1,3,\*</sup>, Tae Ho Lim, M.D., PhD.<sup>2</sup>, Bohyoung Jang, M.D.,Ph.D.,M.P.H<sup>5</sup>, Youngsuk Cho, M.D.<sup>1,3</sup>, Kyu-Sun Choi, M.D.<sup>4</sup>, Chiwon Ahn, M.D.<sup>3,6</sup>, Juncheol Lee, M.D.<sup>2</sup>, Min Kyun Na, M.D.<sup>4</sup>

<sup>1</sup>Department of Emergency Medicine, College of Medicine, Hallym University, Chuncheon, Republic of Korea

<sup>2</sup>Department of Emergency Medicine, College of Medicine, Hanyang University, Seoul, Korea

<sup>3</sup>Department of Biomedical Engineering, Graduate School of Medicine, Hanyang University, Seoul, Korea

<sup>4</sup>Department of Neurosurgery, College of Medicine, Hanyang University, Seoul, Korea

<sup>5</sup>Department of Preventive Medicine, College of Korean Medicine, Kyung Hee University, Seoul, Korea

<sup>6</sup>Department of Emergency Medicine, Armed Forces Yangju Hospital, Yangju, Korea

<sup>†</sup>Kim and Shin contributed equally to this work.

**\*Corresponding Author:** Wonhee Kim, M.D.

1, Singil-ro, Yeongdeungpo-gu, Seoul, 07441, Republic of Korea

Tel: +82-2-829-5561

Fax: +82-2-842-4217

E-mail: wonsee02@gmail.com

**Key Words:** Thyroxine (T4); Triiodothyronine (T3); Thyroid-stimulating hormone; Sepsis; Mortality; Meta-Analysis

(A)

|               | Study Participation | Study Attrition | Prognostic Factor Measurement | Outcome Measurement | Study Confounding | Statistical Analysis and Presentation |
|---------------|---------------------|-----------------|-------------------------------|---------------------|-------------------|---------------------------------------|
| Cui 2007      | -                   | ?               | +                             | +                   | +                 | +                                     |
| Gonzalez 2016 | -                   | ?               | +                             | +                   | -                 | +                                     |
| Hosny 2015    | +                   | ?               | +                             | +                   | +                 | +                                     |
| Leo-Sanz 1997 | -                   | ?               | +                             | +                   | ?                 | +                                     |
| Mangas 1990   | -                   | ?               | +                             | +                   | -                 | +                                     |
| Meyer 2011    | +                   | ?               | +                             | +                   | +                 | +                                     |
| Sumita 1994   | +                   | ?               | +                             | +                   | +                 | +                                     |
| Todd 2012     | +                   | ?               | +                             | +                   | ?                 | +                                     |

(B)

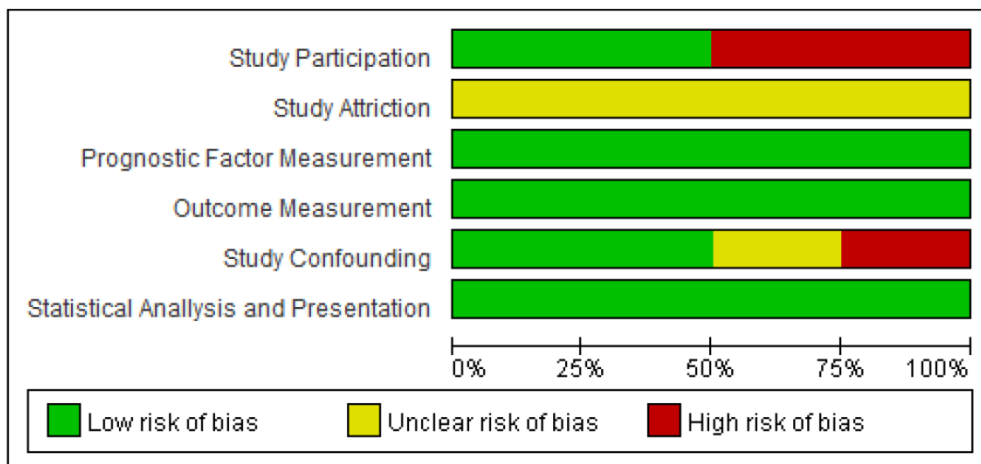

Supplemental Figure S1. The summary of assessment of the risk of bias of the included studies

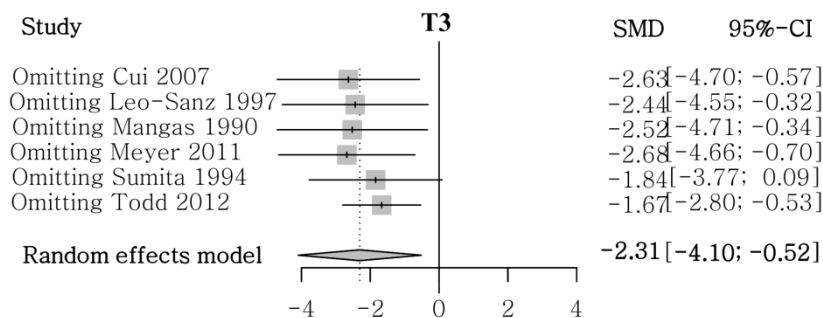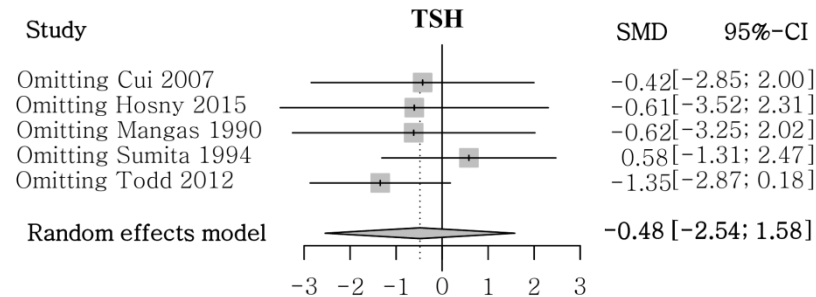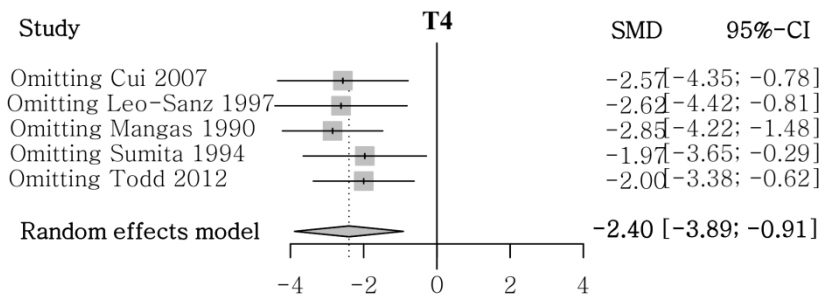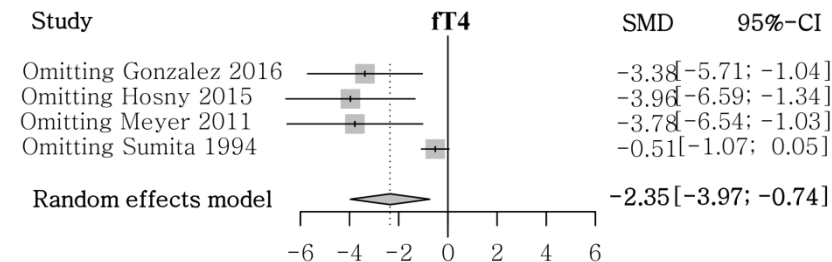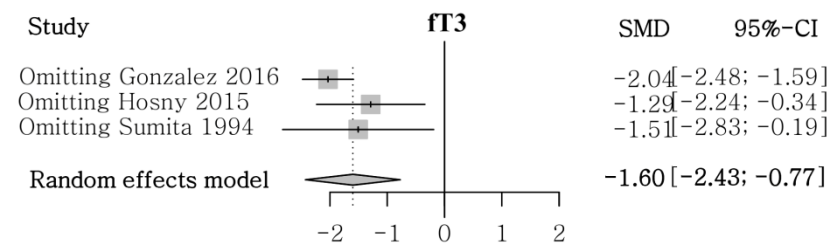

**Supplemental Figure S2. The sensitivity analysis of the included studies**

**Supplemental Table S1.** Definition of sepsis

| Identification | Inclusion criteria                        | Definition of SIRS, sepsis, severe sepsis, and septic shock                                                                                                                                                                                                                                                                                                                                                                                                                                                                                                                                                                                                                                                                                                                 |
|----------------|-------------------------------------------|-----------------------------------------------------------------------------------------------------------------------------------------------------------------------------------------------------------------------------------------------------------------------------------------------------------------------------------------------------------------------------------------------------------------------------------------------------------------------------------------------------------------------------------------------------------------------------------------------------------------------------------------------------------------------------------------------------------------------------------------------------------------------------|
| Cui 2007       | Severe sepsis,<br>Septic shock            | <p>Defined by the criteria of ACCP/SCCM in 1992:</p> <p>Severe sepsis is the sepsis associated with organ dysfunction, hypoperfusion, or hypotension. Hypoperfusion and perfusion abnormalities may include, but are not limited to lactic acidosis, oliguria, or an acute alteration in mental status.</p> <p>Septic shock is the sepsis-induced with hypotension despite adequate fluid resuscitation along with the presence of perfusion abnormalities that may include, but are not limited to, lactic acidosis, oliguria, or an acute alteration in mental status. Patients who are receiving inotropic or vasopressor agents may not be hypotensive at the time that perfusion abnormalities are measured.</p>                                                       |
| Gonzalez 2016  | Severe sepsis,<br>Septic shock            | Severe sepsis or septic shock (abstract only).                                                                                                                                                                                                                                                                                                                                                                                                                                                                                                                                                                                                                                                                                                                              |
| Hosny 2015     | Sepsis,<br>Severe sepsis,<br>Septic shock | <p>Sepsis is a culture-proven or visually identified infection accompanied by two or more of the following abnormalities (temperature &gt;38.5 °C or &lt;36 °C, heart rate &gt;90 beats/min, respiratory rate &gt;20 breaths/min or PaCO<sub>2</sub> &lt;32 mmHg and TLC count &gt;12,000 cells/mm<sup>3</sup>, &lt;4000 cells/mm<sup>3</sup>, or &gt;10 percent immature (band) forms.</p> <p>Severe sepsis group included patients with sepsis accompanied by organ failure or hypoperfusion including oliguria and altered mental status.</p> <p>Septic shock group included patients with severe sepsis accompanied by hypotension (systolic blood pressure &lt;90 mmHg or a fall off &gt;40 mmHg from the baseline in the absence of other causes of hypotension).</p> |
| Leo-Sanz 1997  | Septic shock                              | <p>Defined by the criteria of ACCP/SCCM in 1992:</p> <p>Septic shock is a sepsis-induced with hypotension despite adequate fluid resuscitation along with the presence of perfusion abnormalities that may include, but are not limited to, lactic acidosis, oliguria, or an acute alteration in mental status. Patients who are receiving inotropic or vasopressor agents may not be hypotensive at the time that perfusion abnormalities are measured.</p>                                                                                                                                                                                                                                                                                                                |
| Mangas 1990    | Sepsis                                    | Fever above 38 °C, characteristic clinical signs, and positive in blood cultures with the same microorganism.                                                                                                                                                                                                                                                                                                                                                                                                                                                                                                                                                                                                                                                               |
| Meyer 2011     | SIRS,                                     | Defined by the criteria of ACCP/SCCM in 1992:                                                                                                                                                                                                                                                                                                                                                                                                                                                                                                                                                                                                                                                                                                                               |

|             |                                                     |                                                                                                                                                                                                                                                                                                                                                                                                                                                                                                                                                                                                                                                                                                                                                                                                                                                                                                                                                                                                                                                                                                                                                                                                                                                                                                                                                                                                                                                                                                                  |
|-------------|-----------------------------------------------------|------------------------------------------------------------------------------------------------------------------------------------------------------------------------------------------------------------------------------------------------------------------------------------------------------------------------------------------------------------------------------------------------------------------------------------------------------------------------------------------------------------------------------------------------------------------------------------------------------------------------------------------------------------------------------------------------------------------------------------------------------------------------------------------------------------------------------------------------------------------------------------------------------------------------------------------------------------------------------------------------------------------------------------------------------------------------------------------------------------------------------------------------------------------------------------------------------------------------------------------------------------------------------------------------------------------------------------------------------------------------------------------------------------------------------------------------------------------------------------------------------------------|
|             | Sepsis,<br>Severe sepsis,<br>Septic shock           | <p>SIRS is the systemic inflammatory response to a variety of severe clinical insults. The response is manifested by two or more of the following conditions: (1) temperature &gt;38°C or &lt;36°C; (2) heart rate &gt;90 beats per minute; (3) respiratory rate &gt;20 breaths per minute or PaCO<sub>2</sub> &lt;32 mm Hg; and (4) white blood cell count &gt;12,000 /cu mm, &lt;4,000/cu mm, or &gt; 10% immature (band) forms.</p> <p>Sepsis is the systemic response to infection, manifested by two or more of the following conditions as a result of infection: (1) temperature &gt;38°C or &lt;36°C; (2) heart rate &gt;90 beats per minute; (3) respiratory rate &gt;20 breaths per minute or PaCO<sub>2</sub> &lt;32 mm Hg; and white blood cell count &gt; 12,000 /cu mm, &lt;4,000/cu mm, or &gt; 10% immature (band) forms.</p> <p>Severe sepsis is the sepsis associated with organ dysfunction, hypoperfusion, or hypotension. Hypoperfusion and perfusion abnormalities may include, but are not limited to lactic acidosis, oliguria, or an acute alteration in mental status.</p> <p>Septic shock = sepsis-induced with hypotension despite adequate fluid resuscitation along with the presence of perfusion abnormalities that may include, but are not limited to, lactic acidosis, oliguria, or an acute alteration in mental status.</p> <p>Patients who are receiving inotropic or vasopressor agents may not be hypotensive at the time that perfusion abnormalities are measured.</p> |
| Sumita 1994 | Sepsis                                              | Sepsis was defined by septic score. The septic score is a simple system for grading the severity of sepsis has been developed by scoring the attributes of sepsis under four headings: local effects of infection, pyrexia, secondary effects of sepsis and laboratory data.                                                                                                                                                                                                                                                                                                                                                                                                                                                                                                                                                                                                                                                                                                                                                                                                                                                                                                                                                                                                                                                                                                                                                                                                                                     |
| Todd 2012   | Sepsis (surgical)<br>Severe sepsis,<br>Septic shock | Surgical sepsis is defined as the systemic inflammatory response syndrome in addition to an infection requiring surgical intervention for source control or systemic inflammatory response syndrome plus an infection within 14 days of a major surgical procedure.                                                                                                                                                                                                                                                                                                                                                                                                                                                                                                                                                                                                                                                                                                                                                                                                                                                                                                                                                                                                                                                                                                                                                                                                                                              |

SIRS = severe inflammatory response syndrome, ACCP = American College of Chest Physicians, SCCM = Society of Critical Care Medicine

**Supplemental Table S2.** Detailed information of population

| Study identification       | Infection site |                          |                         | Severity                        |                                                                      |                       | ICU stay                         |
|----------------------------|----------------|--------------------------|-------------------------|---------------------------------|----------------------------------------------------------------------|-----------------------|----------------------------------|
|                            | Lung, %        | Gastrointestinal tract,% | Genitorurianry tract, % | APACHE II, Mean $\pm$ SD        | SOFA score, Mean $\pm$ SD                                            | SAPS II Median(IQR)   | Day Mean $\pm$ SD or Median(IQR) |
| Cui 2007                   | -              | -                        | -                       | -                               |                                                                      |                       | -                                |
| Gonzalez <sup>A</sup> 2016 | -              | -                        | -                       |                                 |                                                                      |                       | -                                |
| Hosny 2015                 | 41.5 / 53.8    | 14.6 / 35.9              | 23.3 / 12.8             | 10.3 $\pm$ 3.2 / 26.6 $\pm$ 7   | D2: 2.7 $\pm$ 1.6 / 14 $\pm$ 2.8<br>D5: 0.9 $\pm$ 0.9 / 17.4 $\pm$ 3 |                       | 8.2 $\pm$ 4.4 / 21.4 $\pm$ 18.8  |
| Leo-Sanz 1997              | 53.3 / 41.6    | 26.6 / 50                | 20 / 8.3                |                                 |                                                                      |                       | -                                |
| Mangas 1990                |                |                          |                         |                                 |                                                                      |                       | -                                |
| Meyer 2011                 | 52.8 / 64.7    | 22.2 / 23.5              | 19.4 / 11.8             | 21(16-25.5) / 27(19-31.8)       |                                                                      | 50(39-62) / 67(53-83) | 3 (1-4) <sup>†</sup>             |
| Sumita 1994                | -              | -                        | -                       | 15.7 $\pm$ 1.2 / 21.7 $\pm$ 1.6 |                                                                      |                       | -                                |
| Todd 2012                  | -              | -                        | -                       | -                               |                                                                      |                       | -                                |

Each domain is described as a value corresponding to survivors / non-survivors

\*These are the results of the total population including survivors and nonsurvivors.

<sup>†</sup>The value was measured for both survivors and non-survivors.

**Supplemental Table S3.** Comprehensive list presenting the search strategy

Sepsis\_Thyroid

EMBASE 1806

MEDLINE 316

EMBASE

|                                                  |        |
|--------------------------------------------------|--------|
| 1. exp systemic inflammatory response syndrome/  | 225028 |
| 2. septic shock/ or sepsis/ or severe sepsis.mp. | 161635 |
| 3. exp bacteremia/ or bacteremia.mp.             | 49919  |
| 4. bacteraemia.mp.                               | 7186   |
| 5. septicemia/ or septicemia.mp.                 | 26450  |
| 6. septicaemia.mp.                               | 7041   |
| 7. 1 or 2 or 3 or 4                              | 240671 |
| 8. exp thyroid hormone/                          | 30047  |
| 9. exp thyroxine/                                | 51604  |
| 10. triiodothyronine.mp.                         | 18581  |
| 11. exp hypothyroidism/                          | 59781  |
| 12. exp thyrotropin/                             | 56319  |
| 13. T4.mp.                                       | 56996  |
| 14. T3.mp.                                       | 57919  |
| 15. exp thyroid function/                        | 17170  |
| 16. exp hyperthyroidism/                         | 59848  |

|                                                            |        |
|------------------------------------------------------------|--------|
| 17. TSH.mp.                                                | 41052  |
| 18. 8 or 9 or 10 or 11 or 12 or 13 or 14 or 15 or 16 or 17 | 247168 |
| 19. 7 and 18                                               | 1806   |



Medline

|                                                                                        |        |
|----------------------------------------------------------------------------------------|--------|
| 1. exp Systemic Inflammatory Response Syndrome/                                        | 113790 |
| 2. exp Sepsis/                                                                         | 110232 |
| 3. exp Shock, Septic/                                                                  | 20714  |
| 4. severe sepsis.mp.                                                                   | 7689   |
| 5. exp Bacteremia/                                                                     | 26166  |
| 6. bacteraemia.mp.                                                                     | 5420   |
| 7. septicemia.mp.                                                                      | 14028  |
| 8. septicaemia.mp.                                                                     | 6104   |
| 9. 1 or 2 or 3 or 4 or 5 or 6                                                          | 127460 |
| 10. exp Thyroid Hormones/                                                              | 62598  |
| 11. exp Triiodothyronine/ or exp Hypothyroidism/ or exp Thyroxine/ or exp Thyrotropin/ | 85540  |
| 12. T4.mp.                                                                             | 43086  |
| 13. T3.mp.                                                                             | 40983  |
| 14. thyroid function.mp.                                                               | 25001  |
| 15. exp Hyperthyroidism/                                                               | 42494  |
| 16. TSH.mp.                                                                            | 28879  |
| 17. 10 or 11 or 12 or 13 or 14 or 15 or 16                                             | 182587 |
| 18. 9 and 17                                                                           | 316    |
